# Supplementary material for: Dysfunctional gut microbiota and relative co-abundance network in infantile eczema
Source: PubMed Central journal article supplement (PMC4957860; doi:10.1186/s13099-016-0118-0), 2016-07-22
Supplement: 13099_2016_118_MOESM3_ESM.pdf [file 13099_2016_118_MOESM3_ESM.pdf]

A

## Klebsiella quasipneumoniae subsp. similipneumoniae strain 07A044 16S ribosomal RNA, partial sequence

Sequence ID: [ref|NR\\_134063.1](#) Length: 1462 Number of Matches: 1Range 1: 502 to 897 [GenBank](#) [Graphics](#) ▼ Next Match ▲ Previous Match

| Score         | Expect                                                       | Identities   | Gaps      | Strand    |
|---------------|--------------------------------------------------------------|--------------|-----------|-----------|
| 726 bits(393) | 0.0                                                          | 395/396(99%) | 0/396(0%) | Plus/Plus |
| Query 1       | TAATACGGAGGGTGCAACGCGTAAATCGGAATTACTGGCGGTAAGCGCACCGAGCGGTC  | 60           |           |           |
| Sbjct 502     | TAATACGGAGGGTGCAACGCGTAAATCGGAATTACTGGCGGTAAGCGCACCGAGCGGTC  | 561          |           |           |
| Query 61      | TGTCAGTCGGATGTGAAAATCCCGGGCTCAACTGGGAACTGCAATTCGAAAATGGCAGG  | 120          |           |           |
| Sbjct 562     | TGTCAGTCGGATGTGAAAATCCCGGGCTCAACTGGGAACTGCAATTCGAAAATGGCAGG  | 621          |           |           |
| Query 121     | CTAGAGTCTTGTAGAGGGGGTAGAAATCCAGGTGTAGCGGTAAATCGGTAGAGATCTG   | 180          |           |           |
| Sbjct 622     | CTAGAGTCTTGTAGAGGGGGTAGAAATCCAGGTGTAGCGGTAAATCGGTAGAGATCTG   | 681          |           |           |
| Query 181     | GAGGAAATCCGGTGGCGAAGCGGCCCTGGACAAGACTGACGCTCAGGTGCGAAAAC     | 240          |           |           |
| Sbjct 682     | GAGGAAATCCGGTGGCGAAGCGGCCCTGGACAAGACTGACGCTCAGGTGCGAAAAC     | 741          |           |           |
| Query 241     | GTGGGGAGCAAAACAGGATTAGATAACCTGGTAGTCCACCGCTAAACGATGTGCAATTTG | 300          |           |           |
| Sbjct 742     | GTGGGGAGCAAAACAGGATTAGATAACCTGGTAGTCCACCGCTAAACGATGTGCAATTTG | 801          |           |           |
| Query 301     | AGGTTGTGCCCTTGAGGCGTGCTTCCGAGCTAACCGGTTAAATCGACCGCTGGGGAG    | 360          |           |           |
| Sbjct 802     | AGGTTGTGCCCTTGAGGCGTGCTTCCGAGCTAACCGGTTAAATCGACCGCTGGGGAG    | 861          |           |           |
| Query 361     | TACGCCGCAAGGTTAAAACTAAATGAATTGACGG                           | 396          |           |           |
| Sbjct 862     | TACGCCGCAAGGTTAAAACTAAATGAATTGACGG                           | 897          |           |           |

Related

## Enterobacter cloacae subsp. dissolvens strain ATCC 23373 16S ribosomal RNA gene, partial sequence

Sequence ID: [ref|NR\\_118011.1](#) Length: 1507 Number of Matches: 1Range 1: 520 to 915 [GenBank](#) [Graphics](#) ▼ Next Match ▲ Previous Match

| Score         | Expect                                                       | Identities   | Gaps      | Strand    |
|---------------|--------------------------------------------------------------|--------------|-----------|-----------|
| 726 bits(393) | 0.0                                                          | 395/396(99%) | 0/396(0%) | Plus/Plus |
| Query 1       | TAATACGGAGGGTGCAACGCGTAAATCGGAATTACTGGCGGTAAGCGCACCGAGCGGTC  | 60           |           |           |
| Sbjct 520     | TAATACGGAGGGTGCAACGCGTAAATCGGAATTACTGGCGGTAAGCGCACCGAGCGGTC  | 579          |           |           |
| Query 61      | TGTCAGTCGGATGTGAAAATCCCGGGCTCAACTGGGAACTGCAATTCGAAAATGGCAGG  | 120          |           |           |
| Sbjct 580     | TGTCAGTCGGATGTGAAAATCCCGGGCTCAACTGGGAACTGCAATTCGAAAATGGCAGG  | 639          |           |           |
| Query 121     | CTAGAGTCTTGTAGAGGGGGTAGAAATCCAGGTGTAGCGGTAAATCGGTAGAGATCTG   | 180          |           |           |
| Sbjct 640     | CTAGAGTCTTGTAGAGGGGGTAGAAATCCAGGTGTAGCGGTAAATCGGTAGAGATCTG   | 699          |           |           |
| Query 181     | GAGGAAATCCGGTGGCGAAGCGGCCCTGGACAAGACTGACGCTCAGGTGCGAAAAC     | 240          |           |           |
| Sbjct 700     | GAGGAAATCCGGTGGCGAAGCGGCCCTGGACAAGACTGACGCTCAGGTGCGAAAAC     | 759          |           |           |
| Query 241     | GTGGGGAGCAAAACAGGATTAGATAACCTGGTAGTCCACCGCTAAACGATGTGCAATTTG | 300          |           |           |
| Sbjct 760     | GTGGGGAGCAAAACAGGATTAGATAACCTGGTAGTCCACCGCTAAACGATGTGCAATTTG | 819          |           |           |
| Query 301     | AGGTTGTGCCCTTGAGGCGTGCTTCCGAGCTAACCGGTTAAATCGACCGCTGGGGAG    | 360          |           |           |
| Sbjct 820     | AGGTTGTGCCCTTGAGGCGTGCTTCCGAGCTAACCGGTTAAATCGACCGCTGGGGAG    | 879          |           |           |
| Query 361     | TACGCCGCAAGGTTAAAACTAAATGAATTGACGG                           | 396          |           |           |
| Sbjct 880     | TACGCCGCAAGGTTAAAACTAAATGAATTGACGG                           | 915          |           |           |

Related

B

## Shigella sonnei Ss046 strain Ss046 16S ribosomal RNA, complete sequence

Sequence ID: [ref|NR\\_074894.1](#) Length: 1542 Number of Matches: 1Range 1: 531 to 926 [GenBank](#) [Graphics](#) ▼ Next Match ▲ Previous Match

| Score         | Expect                                                      | Identities   | Gaps      | Strand    |
|---------------|-------------------------------------------------------------|--------------|-----------|-----------|
| 726 bits(393) | 0.0                                                         | 395/396(99%) | 0/396(0%) | Plus/Plus |
| Query 1       | TAATACGGAGGGTGCAACGCGTAAATCGGAATTACTGGCGGTAAGCGCACCGAGCGGTT | 60           |           |           |
| Sbjct 531     | TAATACGGAGGGTGCAACGCGTAAATCGGAATTACTGGCGGTAAGCGCACCGAGCGGTT | 590          |           |           |
| Query 61      | TGTTAAGTCAGATGTGAAAATCCCGGGCTCAACTGGGAACTGCACTGTA TACTGCAAG | 120          |           |           |
| Sbjct 591     | TGTTAAGTCAGATGTGAAAATCCCGGGCTCAACTGGGAACTGCACTGTA TACTGCAAG | 650          |           |           |
| Query 121     | CTTGAGTCTCGTAGAGGGGGTAGAAATCCAGGTGTAGCGGTAAATCGGTAGAGATCTG  | 180          |           |           |
| Sbjct 651     | CTTGAGTCTCGTAGAGGGGGTAGAAATCCAGGTGTAGCGGTAAATCGGTAGAGATCTG  | 710          |           |           |
| Query 181     | GAGGAAATCCGGTGGCGAAGCGGCCCTGGACGAAAGACTGACGCTCAGGTGCGAAAAC  | 240          |           |           |
| Sbjct 711     | GAGGAAATCCGGTGGCGAAGCGGCCCTGGACGAAAGACTGACGCTCAGGTGCGAAAAC  | 770          |           |           |
| Query 241     | GTGGGGAGCAAAACAGGATTAGATAACCTGGTAGTCCACCGCTAAACGATGTGCACTTG | 300          |           |           |
| Sbjct 771     | GTGGGGAGCAAAACAGGATTAGATAACCTGGTAGTCCACCGCTAAACGATGTGCACTTG | 830          |           |           |
| Query 301     | AGGTTGTGCCCTTGAGGCGTGCTTCCGAGCTAACCGGTTAAGTCGACCGCTGGGGAG   | 360          |           |           |
| Sbjct 831     | AGGTTGTGCCCTTGAGGCGTGCTTCCGAGCTAACCGGTTAAGTCGACCGCTGGGGAG   | 890          |           |           |
| Query 361     | TACGCCGCAAGGTTAAAACTAAATGAATTGACGG                          | 396          |           |           |
| Sbjct 891     | TACGCCGCAAGGTTAAAACTAAATGAATTGACGG                          | 926          |           |           |

## Cronobacter turicensis strain z3032 16S ribosomal RNA gene, complete sequence

Sequence ID: [ref|NR\\_102802.1](#) Length: 1543 Number of Matches: 1Range 1: 531 to 926 [GenBank](#) [Graphics](#) ▼ Next Match ▲ Previous Match

| Score         | Expect                                                      | Identities   | Gaps      | Strand    |
|---------------|-------------------------------------------------------------|--------------|-----------|-----------|
| 715 bits(387) | 0.0                                                         | 393/396(99%) | 0/396(0%) | Plus/Plus |
| Query 1       | TAATACGGAGGGTGCAACGCGTAAATCGGAATTACTGGCGGTAAGCGCACCGAGCGGTT | 60           |           |           |
| Sbjct 531     | TAATACGGAGGGTGCAACGCGTAAATCGGAATTACTGGCGGTAAGCGCACCGAGCGGTT | 590          |           |           |
| Query 61      | TGTTAAGTCAGATGTGAAAATCCCGGGCTCAACTGGGAACTGCACTGTA TACTGCAAG | 120          |           |           |
| Sbjct 591     | TGTTAAGTCAGATGTGAAAATCCCGGGCTCAACTGGGAACTGCACTGTA TACTGCAAG | 650          |           |           |
| Query 121     | CTTGAGTCTCGTAGAGGGGGTAGAAATCCAGGTGTAGCGGTAAATCGGTAGAGATCTG  | 180          |           |           |
| Sbjct 651     | CTTGAGTCTCGTAGAGGGGGTAGAAATCCAGGTGTAGCGGTAAATCGGTAGAGATCTG  | 710          |           |           |
| Query 181     | GAGGAAATCCGGTGGCGAAGCGGCCCTGGACGAAAGACTGACGCTCAGGTGCGAAAAC  | 240          |           |           |
| Sbjct 711     | GAGGAAATCCGGTGGCGAAGCGGCCCTGGACGAAAGACTGACGCTCAGGTGCGAAAAC  | 770          |           |           |
| Query 241     | GTGGGGAGCAAAACAGGATTAGATAACCTGGTAGTCCACCGCTAAACGATGTGCACTTG | 300          |           |           |
| Sbjct 771     | GTGGGGAGCAAAACAGGATTAGATAACCTGGTAGTCCACCGCTAAACGATGTGCACTTG | 830          |           |           |
| Query 301     | AGGTTGTGCCCTTGAGGCGTGCTTCCGAGCTAACCGGTTAAGTCGACCGCTGGGGAG   | 360          |           |           |
| Sbjct 831     | AGGTTGTGCCCTTGAGGCGTGCTTCCGAGCTAACCGGTTAAGTCGACCGCTGGGGAG   | 890          |           |           |
| Query 361     | TACGCCGCAAGGTTAAAACTAAATGAATTGACGG                          | 396          |           |           |
| Sbjct 891     | TACGCCGCAAGGTTAAAACTAAATGAATTGACGG                          | 926          |           |           |
